# Supplementary material for: PAM-Flexible Genome Editing with an Engineered Chimeric Cas9
Source: Research Square preprint supplement (doi:10.21203/rs.3.rs-2625838/v1), 2023-03-07
Supplement: Supplementary file 1 [file 7323d0741212f7fa7613c8cd.xlsx]

## Sheet: WT SpCas9
	WT SpCas9
	AA-expRAS28_sample_001	AC-expRAS28_sample_001	AG-expRAS28_sample_001	AT-expRAS28_sample_001	CA-expRAS28_sample_001	CC-expRAS28_sample_001	CG-expRAS28_sample_001	CT-expRAS28_sample_001	GA-expRAS28_sample_001	GC-expRAS28_sample_001	GG-expRAS28_sample_001	GT-expRAS28_sample_001	TA-expRAS28_sample_001	TC-expRAS28_sample_001	TG-expRAS28_sample_001	TT-expRAS28_sample_001
AA	-10.8354	-5.11144	-10.8354	-5.66703	-10.8354	-10.8354	-4.83643	-10.8354	-3.06833	-2.8238	-2.91748	-3.13022	-4.86543	-7.6458	-5.28263	-5.13036
CA	-10.8354	-10.8354	-10.8354	-10.8354	-5.35046	-5.54047	-4.80907	-10.8354	-3.63736	-3.1546	-4.10631	-3.31423	-6.75203	-10.8354	-10.8354	-10.8354
GA	-10.8354	-10.8354	-10.8354	-10.8354	-4.28694	-10.8354	-10.8354	-10.8354	-2.49391	-2.70782	-2.89741	-2.6096	-5.5146	-10.8354	-10.8354	-10.8354
TA	-10.8354	-10.8354	-10.8354	-10.8354	-6.94374	-10.8354	-10.8354	-10.8354	-4.17672	-3.45144	-2.86132	-3.87231	-10.8354	-10.8354	-5.79239	-5.45218
AC	-5.49847	-10.8354	-10.8354	-10.8354	-5.2365	-5.14531	-10.8354	-10.8354	-10.8354	-5.26955	-3.01952	-10.8354	-10.8354	-10.8354	-10.8354	-10.8354
CC	-10.8354	-10.8354	-10.8354	-10.8354	-10.8354	-10.8354	-10.8354	-4.62467	-5.07856	-4.97442	-4.78329	-10.8354	-10.8354	-10.8354	-10.8354	-10.8354
GC	-4.73549	-5.36891	-5.30314	-10.8354	-4.64773	-10.8354	-4.09816	-10.8354	-4.45087	-10.8354	-3.75569	-4.81201	-10.8354	-5.3231	-10.8354	-10.8354
TC	-4.7873	-10.8354	-5.77468	-10.8354	-10.8354	-10.8354	-10.8354	-10.8354	-10.8354	-5.05109	-2.85763	-10.8354	-4.75462	-5.19555	-4.65123	-10.8354
AG	-4.05584	-4.04396	-3.18083	-4.1559	-4.71246	-10.8354	-4.88797	-5.42148	-1.44719	-1.16506	-1.39309	-0.421011	-4.92392	-10.8354	-4.84532	-5.00044
CG	-4.3988	-3.91827	-3.62337	-4.17579	-6.44054	-4.5343	-10.8354	-5.07324	0.20779	-1.45485	-1.35843	-1.16696	-4.85595	-10.8354	-4.05688	-5.22805
GG	-3.98259	-3.98073	-3.55467	-3.90715	-4.74235	-4.79511	-4.55746	-10.8354	0.139765	-0.336516	-0.110464	-0.0152398	-4.5959	-10.8354	-4.09793	-10.8354
TG	-4.16566	-3.9207	-3.56635	-4.29579	-5.03933	-4.51012	-10.8354	-4.96255	-0.292428	-1.34175	-0.536364	-0.145775	-10.8354	-10.8354	-4.89394	-10.8354
AT	-10.8354	-10.8354	-10.8354	-10.8354	-10.8354	-5.92191	-4.9758	-10.8354	-10.8354	-4.37379	-2.7346	-4.75884	-10.8354	-10.8354	-10.8354	-10.8354
CT	-10.8354	-10.8354	-4.9678	-10.8354	-10.8354	-10.8354	-10.8354	-10.8354	-4.10465	-10.8354	-5.2604	-4.93433	-10.8354	-10.8354	-10.8354	-10.8354
GT	-4.24362	-5.49916	-10.8354	-10.8354	-10.8354	-10.8354	-5.07927	-5.30494	-10.8354	-5.1053	-3.12684	-4.35688	-10.8354	-4.60825	-4.91314	-4.50772
TT	-10.8354	-10.8354	-4.62388	-7.91959	-10.8354	-10.8354	-10.8354	-10.8354	-10.8354	-4.58371	-2.92529	-10.8354	-6.84779	-6.33377	-4.81939	-4.96816

## Sheet: Sc++
	Sc++
	AA-expRAS28_sample_093	AC-expRAS28_sample_093	AG-expRAS28_sample_093	AT-expRAS28_sample_093	CA-expRAS28_sample_093	CC-expRAS28_sample_093	CG-expRAS28_sample_093	CT-expRAS28_sample_093	GA-expRAS28_sample_093	GC-expRAS28_sample_093	GG-expRAS28_sample_093	GT-expRAS28_sample_093	TA-expRAS28_sample_093	TC-expRAS28_sample_093	TG-expRAS28_sample_093	TT-expRAS28_sample_093
AA	-10.8354	-10.8354	-4.94366	-10.8354	-10.8354	-4.58162	-4.81821	-10.8354	-3.34794	-0.355149	-1.90676	-1.77219	-10.8354	-10.8354	-4.57511	-10.8354
CA	-10.8354	-10.8354	-4.94615	-10.8354	-5.11749	-4.85913	-6.0954	-4.84457	-3.27755	-1.80456	-1.9946	-1.736	-10.8354	-5.46586	-4.66575	-5.15343
GA	-10.8354	-6.90471	-4.86503	-4.76327	-10.8354	-4.9384	-4.08972	-4.48659	-2.38818	-1.85065	-1.84058	-1.85514	-10.8354	-10.8354	-4.85558	-10.8354
TA	-10.8354	-10.8354	-4.89727	-10.8354	-5.31256	-5.49563	-4.41215	-10.8354	-4.02495	-2.10253	-3.08265	-1.89899	-10.8354	-10.8354	-10.8354	-10.8354
AC	-10.8354	-4.84016	-5.29394	-4.72123	-10.8354	-10.8354	-10.8354	-10.8354	-4.19376	-3.32154	-2.8996	-2.00193	-10.8354	-10.8354	-4.89416	-10.8354
CC	-10.8354	-4.71547	-4.7226	-10.8354	-10.8354	-4.64622	-5.40158	-10.8354	-10.8354	-4.44039	-10.8354	-3.69987	-10.8354	-5.41293	-10.8354	-5.42087
GC	-10.8354	-4.65339	-4.39968	-10.8354	-4.43326	-10.8354	-4.48944	-4.50077	-10.8354	-3.90695	-3.51727	-2.00854	-10.8354	-4.89725	-4.69676	-5.39433
TC	-4.75238	-4.77274	-10.8354	-4.82262	-5.54611	-10.8354	-10.8354	-10.8354	-10.8354	-5.02939	-4.34933	-4.13771	-10.8354	-10.8354	-10.8354	-10.8354
AG	-10.8354	-10.8354	-3.98057	-10.8354	-10.8354	-10.8354	-4.46235	-10.8354	-4.26304	-3.09938	-3.37796	-2.28474	-4.83466	-10.8354	-4.95388	-10.8354
CG	-4.83751	-10.8354	-4.90419	-4.95921	-5.55049	-5.89445	-4.84373	-10.8354	-4.36165	-3.81683	-3.50033	-3.41178	-10.8354	-4.64145	-4.09205	-4.19289
GG	-10.8354	-4.39311	-10.8354	-10.8354	-10.8354	-10.8354	-4.61455	-4.48163	-4.22876	-3.63108	-3.66678	-3.20715	-10.8354	-4.28326	-4.44113	-4.35005
TG	-10.8354	-5.20601	-4.11789	-5.90154	-5.17553	-4.39634	-10.8354	-10.8354	-4.37879	-4.05509	-3.46242	-3.29118	-10.8354	-4.72885	-4.84254	-4.71613
AT	-10.8354	-5.34122	-4.29023	-10.8354	-10.8354	-5.02742	-4.40233	-10.8354	-4.60427	-3.63024	-3.85287	-3.51292	-10.8354	-10.8354	-10.8354	-10.8354
CT	-10.8354	-10.8354	-4.22206	-10.8354	-10.8354	-10.8354	-6.00164	-10.8354	-5.37336	-3.96324	-10.8354	-3.59248	-10.8354	-10.8354	-6.23327	-10.8354
GT	-10.8354	-4.47058	-4.99275	-10.8354	-4.77827	-4.88425	-4.16605	-4.32755	-4.21299	-3.29109	-3.61544	-2.69084	-10.8354	-10.8354	-5.2747	-10.8354
TT	-10.8354	-10.8354	-6.07885	-10.8354	-10.8354	-10.8354	-4.57656	-10.8354	-10.8354	-10.8354	-5.37421	-4.13672	-10.8354	-10.8354	-5.16926	-10.8354

## Sheet: SpRY
	SpRY
	AA-expRAS28_sample_094	AC-expRAS28_sample_094	AG-expRAS28_sample_094	AT-expRAS28_sample_094	CA-expRAS28_sample_094	CC-expRAS28_sample_094	CG-expRAS28_sample_094	CT-expRAS28_sample_094	GA-expRAS28_sample_094	GC-expRAS28_sample_094	GG-expRAS28_sample_094	GT-expRAS28_sample_094	TA-expRAS28_sample_094	TC-expRAS28_sample_094	TG-expRAS28_sample_094	TT-expRAS28_sample_094
AA	-3.35813	-3.07921	-1.81147	-2.90194	-2.10538	-2.77089	-2.07947	-2.32651	-2.15442	-3.5096	-1.91991	-2.34125	-3.7873	-3.90235	-2.08065	-3.51089
CA	-3.93496	-3.55903	-2.21301	-3.4785	-3.2051	-3.61115	-2.09065	-3.15142	-3.53447	-4.49658	-2.77312	-3.2275	-3.96299	-10.8354	-2.27239	-4.52779
GA	-2.59825	-2.64579	-1.91012	-2.53868	-1.97605	-2.58774	-1.96919	-2.1441	-2.90844	-2.82476	-1.73992	-2.29261	-3.21216	-3.55617	-1.92764	-3.46528
TA	-3.90134	-3.53648	-2.07906	-3.84811	-3.29777	-3.50878	-2.37948	-2.80744	-3.79142	-4.4218	-2.67474	-3.06809	-10.8354	-10.8354	-2.94988	-4.7097
AC	-4.09794	-4.32126	-2.78459	-4.33297	-10.8354	-10.8354	-3.89882	-4.61409	-4.87233	-10.8354	-3.29087	-3.47264	-10.8354	-10.8354	-3.15203	-5.20178
CC	-10.8354	-10.8354	-10.8354	-10.8354	-10.8354	-10.8354	-10.8354	-10.8354	-10.8354	-10.8354	-10.8354	-10.8354	-10.8354	-10.8354	-10.8354	-10.8354
GC	-5.10721	-4.90896	-2.9966	-4.40274	-10.8354	-5.16747	-3.88771	-4.16162	-10.8354	-10.8354	-3.86179	-4.08666	-10.8354	-10.8354	-3.3198	-4.8338
TC	-10.8354	-10.8354	-10.8354	-10.8354	-10.8354	-10.8354	-10.8354	-10.8354	-10.8354	-10.8354	-10.8354	-10.8354	-10.8354	-10.8354	-10.8354	-10.8354
AG	-2.8261	-3.10102	-2.22874	-2.78738	-2.80748	-2.99449	-2.09442	-2.33042	-2.89698	-3.41583	-1.97922	-2.70835	-3.1936	-3.37382	-2.28783	-3.23195
CG	-4.38555	-10.8354	-3.18643	-4.68863	-3.8594	-10.8354	-2.98504	-4.33254	-10.8354	-10.8354	-3.61887	-4.44947	-10.8354	-10.8354	-3.13068	-4.1422
GG	-3.32069	-3.75761	-2.3121	-3.43439	-3.15019	-3.80268	-2.80102	-3.2292	-3.46918	-5.21337	-2.89738	-3.19267	-3.83979	-3.92238	-2.19338	-3.40385
TG	-3.52315	-3.69973	-2.27189	-3.47	-3.45261	-3.81826	-3.15903	-3.51218	-3.72771	-5.4694	-3.15168	-3.30086	-4.50468	-10.8354	-2.96074	-5.19991
AT	-10.8354	-10.8354	-3.59021	-10.8354	-10.8354	-10.8354	-5.06164	-4.48738	-4.07905	-6.29391	-3.10726	-3.26065	-10.8354	-10.8354	-4.30145	-10.8354
CT	-10.8354	-10.8354	-4.76352	-10.8354	-10.8354	-10.8354	-10.8354	-10.8354	-10.8354	-10.8354	-10.8354	-4.15263	-10.8354	-10.8354	-4.76618	-10.8354
GT	-10.8354	-4.80582	-3.04944	-4.47952	-4.66682	-10.8354	-4.09084	-3.97677	-3.72282	-10.8354	-3.14355	-3.113	-10.8354	-10.8354	-4.42971	-10.8354
TT	-10.8354	-10.8354	-10.8354	-10.8354	-10.8354	-10.8354	-10.8354	-10.8354	-10.8354	-10.8354	-10.8354	-10.8354	-10.8354	-10.8354	-10.8354	-10.8354

## Sheet: SpRYc
	SpRYc
	AA-expRAS28_sample_096	AC-expRAS28_sample_096	AG-expRAS28_sample_096	AT-expRAS28_sample_096	CA-expRAS28_sample_096	CC-expRAS28_sample_096	CG-expRAS28_sample_096	CT-expRAS28_sample_096	GA-expRAS28_sample_096	GC-expRAS28_sample_096	GG-expRAS28_sample_096	GT-expRAS28_sample_096	TA-expRAS28_sample_096	TC-expRAS28_sample_096	TG-expRAS28_sample_096	TT-expRAS28_sample_096
AA	-3.99574	-3.74607	-2.78974	-3.9119	-3.5045	-3.64101	-2.48878	-3.60233	-4.07066	-3.87092	-2.83988	-3.77288	-4.56001	-5.12478	-2.96246	-5.16137
CA	-4.97217	-4.22589	-3.13789	-10.8354	-3.75619	-4.21313	-2.85568	-3.86645	-10.8354	-10.8354	-3.48941	-4.00543	-10.8354	-10.8354	-3.79177	-10.8354
GA	-3.71229	-3.66436	-2.32269	-3.59288	-2.77893	-3.27566	-2.33197	-3.38332	-3.37013	-3.80864	-2.83064	-3.24886	-4.20739	-4.47715	-2.75611	-4.26113
TA	-4.18941	-4.79512	-3.24116	-10.8354	-4.14593	-4.47437	-3.26218	-4.17787	-4.89811	-10.8354	-3.7203	-4.10448	-10.8354	-10.8354	-4.06233	-10.8354
AC	-5.07073	-10.8354	-3.7977	-10.8354	-10.8354	-6.06366	-5.0097	-4.95654	-4.66064	-10.8354	-4.52572	-4.27679	-10.8354	-5.12236	-3.79524	-10.8354
CC	-10.8354	-5.69032	-5.16526	-5.15486	-10.8354	-5.45516	-10.8354	-10.8354	-10.8354	-10.8354	-10.8354	-10.8354	-4.95719	-5.13216	-10.8354	-4.96
GC	-10.8354	-10.8354	-3.88345	-10.8354	-10.8354	-5.57963	-4.43605	-10.8354	-10.8354	-10.8354	-6.07945	-5.12966	-5.04885	-10.8354	-3.7784	-10.8354
TC	-5.03071	-10.8354	-10.8354	-10.8354	-4.6614	-10.8354	-5.39272	-10.8354	-10.8354	-10.8354	-10.8354	-5.70699	-10.8354	-10.8354	-10.8354	-10.8354
AG	-3.8703	-4.5368	-2.98475	-3.73708	-3.56607	-4.05078	-2.84481	-3.66683	-3.73462	-10.8354	-3.06641	-3.77886	-4.11943	-4.32716	-3.15402	-4.01532
CG	-10.8354	-4.91174	-4.08964	-10.8354	-4.82556	-4.15531	-4.26705	-10.8354	-10.8354	-4.95741	-4.381	-4.92932	-10.8354	-10.8354	-3.58421	-5.0422
GG	-3.92331	-4.78	-3.33648	-4.46138	-3.88561	-4.0348	-3.19187	-4.4281	-3.8657	-4.47173	-3.73756	-4.77285	-4.65892	-10.8354	-3.27237	-3.78184
TG	-5.26197	-10.8354	-3.46571	-4.74721	-4.34068	-4.16428	-3.70939	-4.88597	-10.8354	-4.49023	-3.94462	-3.89712	-5.35146	-10.8354	-3.87236	-10.8354
AT	-10.8354	-10.8354	-5.10451	-10.8354	-4.72809	-10.8354	-4.77549	-4.68555	-4.59243	-4.67537	-4.11635	-3.78987	-10.8354	-10.8354	-5.51316	-10.8354
CT	-10.8354	-10.8354	-10.8354	-10.8354	-5.58509	-10.8354	-10.8354	-10.8354	-5.45721	-10.8354	-10.8354	-10.8354	-10.8354	-5.47274	-10.8354	-10.8354
GT	-5.12396	-10.8354	-3.95838	-10.8354	-4.25622	-4.71812	-5.03028	-10.8354	-4.48521	-4.72839	-3.8708	-4.40339	-10.8354	-10.8354	-10.8354	-6.04022
TT	-10.8354	-10.8354	-10.8354	-10.8354	-10.8354	-10.8354	-10.8354	-10.8354	-10.8354	-10.8354	-5.27813	-10.8354	-10.8354	-5.79721	-10.8354	-10.8354
